# Supplementary material for: The effect of oral supplements containing collagen peptides rich in X-Hyp or X-Hyp-Gly compared with normal collagen hydrolysates on skin elasticity and collagen holes: a randomised double-blind clinical study
Source: Royal Society of Chemistry journal article supplement (doi:10.1039/d3fo02873a), 2023-01-01
Supplement: d3fo02873a1.pdf [file d3fo02873a1.pdf]

## Raw Data

### Data for Cellular Uptake:

|                          |                            | Control (mg/mL) | CP product (mg/mL) |
|--------------------------|----------------------------|-----------------|--------------------|
| <b>Without digestion</b> | Cellular accumulation rate | 3.21±0.34       | 5.67±0.60          |
|                          | Transportation rate        | 7.19±0.19       | 18.99±0.38         |
| <b>After digestion</b>   | Cellular accumulation rate | 14.90±1.06      | 12.65±0.99         |
|                          | Transportation rate        | 6.20±0.88       | 14.68±1.45         |

### Data for Molecular Weight Distribution:

| Mw (Da)          | Control | CP product |
|------------------|---------|------------|
| <b>2000+</b>     | 4.06    | 3.31       |
| <b>1000-2000</b> | 10.74   | 6.2        |
| <b>500-1000</b>  | 30.7    | 20.93      |
| <b>200-500</b>   | 50.62   | 62.67      |
| <b>-200</b>      | 3.88    | 6.89       |

**Data for Skin Properties:****Control Product\_T0**

| <b>No.</b> | <b>Age (y)</b> | <b>Height (cm)</b> | <b>Weight (kg)</b> | <b>BMI</b> | <b>R2-A</b> | <b>R5-A</b> | <b>R7-A</b> | <b>Collagen</b> |
|------------|----------------|--------------------|--------------------|------------|-------------|-------------|-------------|-----------------|
| <b>1</b>   | 24             | 155                | 48.3               | 20.10406   | 0.907233    | 1.0187      | 0.8449      | 219.4945        |
| <b>2</b>   | 24             | 190                | 111.3              | 30.83102   | 0.904867    | 0.9296      | 0.776867    | 242.4006        |
| <b>3</b>   | 26             | 180                | 88                 | 27.16049   | 0.8914      | 0.963267    | 0.826833    | 282.9859        |
| <b>4</b>   | 23             | 163                | 61                 | 22.95909   | 0.904867    | 0.9296      | 0.776867    | 232.2713        |
| <b>5</b>   | 30             | 155                | 71.4               | 29.71904   | 0.8914      | 0.963267    | 0.826833    | 171.4728        |
| <b>6</b>   | 25             | 165                | 75.3               | 27.6584    | 0.8554      | 1.032833    | 0.7445      | 236.9692        |
| <b>7</b>   | 23             | 152                | 51.3               | 22.20395   | 0.9019      | 1.041933    | 0.774367    | 224.704         |
| <b>8</b>   | 25             | 192                | 89.9               | 24.38694   | 0.892933    | 0.924067    | 0.8084      | 235.5123        |
| <b>9</b>   | 23             | 158                | 78.2               | 31.32511   | 0.892933    | 0.924067    | 0.8084      | 208.2766        |
| <b>10</b>  | 24             | 168                | 69.8               | 24.73073   | 0.890367    | 1.0541      | 0.789367    | 231.4555        |
| <b>11</b>  | 23             | 163                | 70                 | 26.34649   | 0.8812      | 0.931633    | 0.7909      | 224.0733        |
| <b>12</b>  | 24             | 161                | 58.9               | 22.72289   | 0.8755      | 0.947867    | 0.7877      | 240.7673        |
| <b>13</b>  | 22             | 180                | 80.3               | 24.78395   | 0.845933    | 1.040733    | 0.7416      | 197.4125        |

**Control Product\_T1**

| <b>No.</b> | <b>Age (y)</b> | <b>Height (cm)</b> | <b>Weight (kg)</b> | <b>BMI</b> | <b>R2-A</b> | <b>R5-A</b> | <b>R7-A</b> | <b>Collagen</b> |
|------------|----------------|--------------------|--------------------|------------|-------------|-------------|-------------|-----------------|
| 1          | 24             | 155                | 48.2               | 20.1       | 0.881333333 | 0.958933333 | 0.825233333 | 240.1581        |
| 2          | 24             | 190                | 111                | 30.7       | 0.877466667 | 0.884833333 | 0.746566667 | 255.22985       |
| 3          | 26             | 180                | 86.7               | 26.8       | 0.8597      | 0.8907      | 0.801666667 | 265.21155       |
| 4          | 23             | 163                | 60.1               | 22.6       | 0.870766667 | 0.894033333 | 0.7686      | 226.98          |
| 5          | 30             | 155                | 72.2               | 29.3       | 0.8844      | 1.0092      | 0.831666667 | 257.1986        |
| 6          | 25             | 165                | 74.8               | 27.5       | 0.888966667 | 1.092633333 | 0.806666667 | 239.9347        |
| 7          | 23             | 150                | 51.4               | 22.8       | 0.945933333 | 1.0385      | 0.850033333 | 271.8943        |
| 8          | 25             | 192                | 87.4               | 23.7       | 0.883633333 | 0.946166667 | 0.7967      | 235.10135       |
| 9          | 23             | 156                | 79.2               | 32.5       | 0.875166667 | 0.887866667 | 0.827533333 | 240.66905       |
| 10         | 24             | 168                | 68.4               | 24.2       | 0.858733333 | 1.059166667 | 0.7804      | 221.40525       |
| 11         | 23             | 163                | 69.2               | 26         | 0.9465      | 1.034533333 | 0.846266667 | 229.25105       |
| 12         | 24             | 160                | 57.1               | 21.8       | 0.911966667 | 0.9762      | 0.808933333 | 250.57365       |
| 13         | 22             | 180                | 81.4               | 25.1       | 0.868066667 | 1.1191      | 0.7991      | 242.7341        |

**Control Product\_T2**

| <b>No.</b> | <b>Age (y)</b> | <b>Height (cm)</b> | <b>Weight (kg)</b> | <b>BMI</b> | <b>R2-A</b> | <b>R5-A</b> | <b>R7-A</b> | <b>Collagen</b> |
|------------|----------------|--------------------|--------------------|------------|-------------|-------------|-------------|-----------------|
| 1          | 24             | 155                | 47.3               | 19.7       | 0.8911      | 0.913233333 | 0.7769      | 234.1678        |
| 2          | 24             | 190                | 110.6              | 30.6       | 0.8196      | 0.785966667 | 0.6775      | 248.85625       |
| 3          | 26             | 180                | 86.7               | 26.8       | 0.864966667 | 0.855       | 0.742866667 | 270.03865       |
| 4          | 23             | 163                | 58.7               | 22.1       | 0.855533333 | 0.841       | 0.711633333 | 238.20305       |
| 5          | 30             | 155                | 71.7               | 29.1       | 0.79929     | 0.899233333 | 0.704933333 | 261.15055       |
| 6          | 25             | 165                | 74.2               | 27.3       | 0.883333333 | 1.106       | 0.803033333 | 245.39445       |
| 7          | 23             | 150                | 51.9               | 21.9       | 0.8968      | 0.955166667 | 0.770266667 | 274.4212        |
| 8          | 25             | 192                | 86.3               | 23.4       | 0.789933333 | 0.780933333 | 0.654433333 | 239.93665       |
| 9          | 23             | 156                | 79.1               | 32.5       | 0.827066667 | 0.807366667 | 0.6907      | 233.59105       |
| 10         | 24             | 168                | 69.2               | 24.5       | 0.8648      | 1.140266667 | 0.795566667 | 225.63175       |
| 11         | 23             | 163                | 70                 | 26.3       | 0.8709      | 0.8365      | 0.725       | 213.3499        |
| 12         | 24             | 160                | 55.4               | 21.6       | 0.859033333 | 0.857333333 | 0.773366667 | 257.167         |
| 13         | 22             | 180                | 81                 | 25         | 0.840233333 | 1.1603      | 0.774233333 | 249.6944        |

**CP product\_T0**

| <b>No.</b> | <b>Age (y)</b> | <b>Height (cm)</b> | <b>Weight (kg)</b> | <b>BMI</b> | <b>R2-A</b> | <b>R5-A</b> | <b>R7-A</b> | <b>Collagen</b> |
|------------|----------------|--------------------|--------------------|------------|-------------|-------------|-------------|-----------------|
| <b>1</b>   | 24             | 163                | 66                 | 24.84098   | 0.87        | 1.09        | 0.79        | 239.45          |
| <b>2</b>   | 23             | 174                | 91.8               | 30.32105   | 0.82        | 0.98        | 0.75        | 262.41          |
| <b>3</b>   | 23             | 173                | 79.4               | 26.52945   | 0.85        | 1.06        | 0.78        | 244.03          |
| <b>4</b>   | 24             | 160                | 64.3               | 25.11719   | 0.90        | 1.11        | 0.81        | 238.23          |
| <b>5</b>   | 25             | 150                | 54.3               | 24.13333   | 0.83        | 1.06        | 0.74        | 233.69          |
| <b>6</b>   | 26             | 158                | 60.1               | 24.07467   | 0.87        | 1.04        | 0.79        | 250.94          |
| <b>7</b>   | 30             | 157                | 64.8               | 26.2891    | 0.85        | 0.97        | 0.77        | 242.33          |
| <b>8</b>   | 23             | 157                | 82.7               | 33.55106   | 0.88        | 1.07        | 0.82        | 269.33          |
| <b>9</b>   | 25             | 180                | 79.3               | 24.47531   | 0.86        | 1.12        | 0.76        | 259.38          |
| <b>10</b>  | 28             | 171                | 79.2               | 27.08526   | 0.80        | 0.99        | 0.71        | 234.43          |
| <b>11</b>  | 26             | 160                | 61.4               | 23.98438   | 0.86        | 1.04        | 0.78        | 222.64          |
| <b>12</b>  | 24             | 172                | 67.2               | 22.71498   | 0.87        | 1.08        | 0.82        | 211.26          |
| <b>13</b>  | 25             | 160                | 60.3               | 23.55469   | 0.85        | 1.03        | 0.77        | 230.55          |

**CP product\_T1**

| <b>No.</b> | <b>Age (y)</b> | <b>Height (cm)</b> | <b>Weight (kg)</b> | <b>BMI</b> | <b>R2-A</b> | <b>R5-A</b> | <b>R7-A</b> | <b>Collagen</b> |
|------------|----------------|--------------------|--------------------|------------|-------------|-------------|-------------|-----------------|
| 1          | 24             | 163                | 66.8               | 24.8       | 0.869566667 | 1.111566667 | 0.779733333 | 248.1218        |
| 2          | 23             | 174                | 90.4               | 29.9       | 0.873966667 | 1.099466667 | 0.799766667 | 277.77475       |
| 3          | 23             | 173                | 77.7               | 26         | 0.873366667 | 1.067       | 0.8002      | 245.40925       |
| 4          | 24             | 160                | 63.4               | 24.8       | 0.866033333 | 1.097633333 | 0.7999      | 263.7689        |
| 5          | 25             | 150                | 51.3               | 22.8       | 0.885333333 | 1.111166667 | 0.8196      | 241.4999        |
| 6          | 26             | 158                | 59.8               | 24         | 0.877966667 | 1.050466667 | 0.793233333 | 240.74685       |
| 7          | 30             | 157                | 65.8               | 26.7       | 0.8485      | 1.0058      | 0.734233333 | 242.1953        |
| 8          | 23             | 157                | 82.9               | 33.6       | 0.873266667 | 1.161633333 | 0.821566667 | 271.62465       |
| 9          | 25             | 180                | 80.2               | 24.8       | 0.872866667 | 1.094533333 | 0.778733333 | 248.33535       |
| 10         | 28             | 171                | 76.5               | 26.2       | 0.857566667 | 1.095866667 | 0.786433333 | 245.4005        |
| 11         | 26             | 160                | 61.2               | 23.9       | 0.8869      | 1.086133333 | 0.812433333 | 235.4914        |
| 12         | 24             | 172                | 64.7               | 21.9       | 0.8636      | 1.028033333 | 0.7632      | 254.9286        |
| 13         | 25             | 160                | 57.7               | 22.5       | 0.898933333 | 1.0453      | 0.8077      | 244.885         |

**CP product\_T2**

| <b>No.</b> | <b>Age (y)</b> | <b>Height (cm)</b> | <b>Weight (kg)</b> | <b>BMI</b> | <b>R2-A</b> | <b>R5-A</b> | <b>R7-A</b> | <b>Collagen</b> |
|------------|----------------|--------------------|--------------------|------------|-------------|-------------|-------------|-----------------|
| 1          | 24             | 163                | 66.3               | 25         | 0.9488      | 1.114       | 0.869333333 | 232.5094        |
| 2          | 23             | 174                | 88.6               | 29.3       | 0.956333333 | 1.155233333 | 0.882766667 | 276.28225       |
| 3          | 23             | 173                | 75.6               | 25.3       | 0.959366667 | 1.017333333 | 0.8609      | 245.0362        |
| 4          | 24             | 160                | 62.6               | 24.5       | 0.954866667 | 1.119033333 | 0.9018      | 262.33145       |
| 5          | 25             | 150                | 49.7               | 22.1       | 0.883366667 | 1.1929      | 0.786566667 | 235.2295        |
| 6          | 26             | 158                | 59.3               | 23.8       | 0.929066667 | 1.090533333 | 0.8566      | 252.2211        |
| 7          | 30             | 157                | 65                 | 26.4       | 0.894733333 | 0.939366667 | 0.736733333 | 253.93945       |
| 8          | 23             | 157                | 82.4               | 32.2       | 0.937833333 | 1.148666667 | 0.903966667 | 288.2904        |
| 9          | 25             | 180                | 78.4               | 24.2       | 0.8651      | 1.173566667 | 0.785533333 | 265.2163        |
| 10         | 28             | 171                | 74.5               | 25.5       | 0.878866667 | 1.177133333 | 0.813266667 | 242.03585       |
| 11         | 26             | 160                | 60.2               | 23.5       | 0.930366667 | 1.0699      | 0.8559      | 233.51145       |
| 12         | 24             | 172                | 66.4               | 22.4       | 0.892466667 | 1.127833333 | 0.842333333 | 228.72305       |
| 13         | 25             | 160                | 56.3               | 22         | 0.9603      | 1.089366667 | 0.8846      | 237.9448        |
